# Supplementary material
Source: Elsevier journal article supplement (https://authors.library.caltech.edu/67856/3/mmc2.pdf)

**Supplementary Figure 2:** Growing season temperature as derived from the CRU TS3.22 dataset (Harris et al., 2014; New et al., 1999).

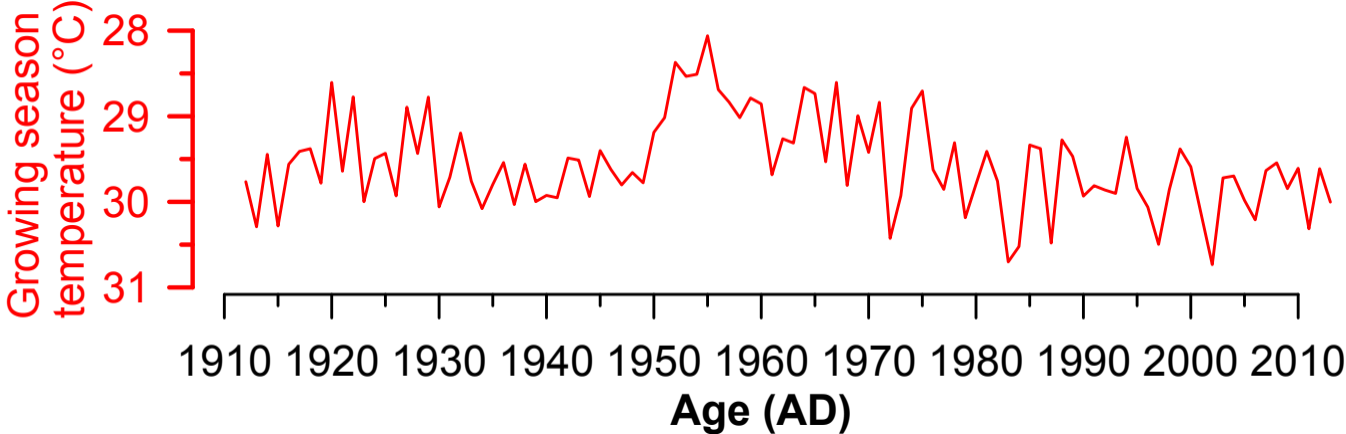

Supplement: mmc2 [file mmc2.pdf]
